# Supplementary material
Source: PubMed Central journal article supplement (PMC8559609)
Supplement: NIHMS1723408-supplement-Supplemental_Material.pdf [file NIHMS1723408-supplement-Supplemental_Material.pdf]

Affective dynamics among veterans: Associations with distress tolerance and posttraumatic  
stress symptoms

Supplemental tables. Table numbers correspond to tables in main paper but are differentiated with the additional a, b, c to signify the respective supplemental models.

A. Tables for the DSEM with only distress tolerance as a predictor.

Table 3a

Within-level standardized estimates

| Parameter        | $\beta$ | PSD   | 95% CI           |
|------------------|---------|-------|------------------|
| $\phi_{nn}$      | 0.37    | 0.004 | (0.358, 0.375)   |
| $\phi_{pp}$      | 0.48    | 0.004 | (0.475, 0.491)   |
| $\phi_{np}$      | -0.03   | 0.004 | (-0.034, -0.020) |
| $\phi_{pn}$      | 0.00    | 0.004 | (-0.008, 0.006)  |
| $\delta PA_{it}$ | 0.65    | 0.004 | (0.641, 0.656)   |
| $\delta NA_{it}$ | 0.52    | 0.006 | (0.510, 0.533)   |
| $\psi_{it}$ by   |         |       |                  |
| PA               | 0.24    | 0.003 | (0.238, 0.251)   |
| NA               | -0.48   | 0.005 | (-0.487, -0.467) |

*Note.*  $\phi_{nn}$  = NA autoregression,  $\phi_{pp}$  PA autoregression,  $\phi_{np}$  = cross-lagged effect NA->PA,  $\phi_{pn}$  = cross-lagged effect PA->NA,  $\delta PA_{it}$  positive affect innovation,  $\delta NA_{it}$  = negative affect innovation.  $\psi_{it}$  is the variance of the common factor  $\eta$  of the residuals, i.e., the residual covariance. The innovation parameters corresponding level 2 random variance terms are referred to as  $\pi_{PA}$  and  $\pi_{NA}$  (for the variances) and  $\psi$  for the covariance in subsequent tables of the between person effects. PSD = posterior standard deviation. CI = Bayes credibility interval.

Table 4a  
Residual variances and correlations of random effects

|                     | Variance<br>(CI)       | 1            | 2            | 3            | 4            | 5           | 6            | 7           | 8     | 9    |
|---------------------|------------------------|--------------|--------------|--------------|--------------|-------------|--------------|-------------|-------|------|
| 1. $\varphi_{nn}$   | 0.037<br>(0.030,0.046) | 1.00         |              |              |              |             |              |             |       |      |
| 2. $\varphi_{pp}$   | 0.027<br>(0.022,0.034) | <b>0.34</b>  | 1.00         |              |              |             |              |             |       |      |
| 3. $\varphi_{np}$   | 0.002<br>(0.001,0.002) | 0.03         | <b>-0.19</b> | 1.00         |              |             |              |             |       |      |
| 4. $\varphi_{pn}$   | 0.012<br>(0.008,0.016) | <b>-0.24</b> | -0.06        | <b>0.82</b>  | 1.00         |             |              |             |       |      |
| 5. $\log(\pi_{PA})$ | 0.883<br>(0.736,1.070) | <b>-0.23</b> | -0.06        | 0.01         | -0.04        | 1.00        |              |             |       |      |
| 6. $\log(\pi_{NA})$ | 2.147<br>(1.770,2.632) | <b>0.21</b>  | <b>-0.27</b> | 0.07         | 0.00         | <b>0.15</b> | 1.00         |             |       |      |
| 7. $\log(\psi)$     | 2.334<br>(1.921,2.859) | 0.05         | 0.05         | <b>-0.41</b> | <b>-0.26</b> | <b>0.44</b> | 0.14         | 1.00        |       |      |
| 8. $\mu_{PA}$       | 1.198<br>(1.001,1.452) | <b>-0.20</b> | 0.07         | -0.13        | -0.11        | <b>0.42</b> | <b>-0.25</b> | <b>0.37</b> | 1.00  |      |
| 9. $\mu_{NA}$       | 0.261<br>(0.216,0.318) | <b>0.34</b>  | <b>-0.16</b> | 0.16         | 0.12         | 0.03        | <b>0.61</b>  | 0.08        | -0.08 | 1.00 |

*Note.*  $\mu_{PA}$ =positive affect mean (random intercept),  $\mu_{NA}$ = negative affect mean (random intercept).  $\varphi_{nn}$  = NA autoregression,  $\varphi_{pp}$  PA autoregression,  $\varphi_{pn}$ = cross-lagged effect NA->PA,  $\varphi_{np}$ = cross-lagged effect PA->NA,  $\log(\pi_{PA})$  = log positive affect innovation variance,  $\log(\pi_{NA})$ = log negative affect innovation variance,  $\log(\psi)$ =log of negative innovation covariance. Bold face effects are significant based on 95% credibility interval (CI).

Table 5a

## Level 2 direct effects

| Variables           | $\beta$      | PSD         | 95% CI                |
|---------------------|--------------|-------------|-----------------------|
| $\phi_{nn}$ ON      |              |             |                       |
| DT                  | <b>-0.34</b> | <b>0.06</b> | <b>(-0.46, -0.21)</b> |
| $\phi_{pp}$ ON      |              |             |                       |
| DT                  | 0.11         | 0.07        | (-0.04, 0.24)         |
| $\phi_{np}$ ON      |              |             |                       |
| DT                  | -0.02        | 0.09        | (-0.20, 0.17)         |
| $\phi_{pn}$ ON      |              |             |                       |
| DT                  | <b>0.18</b>  | <b>0.09</b> | <b>(0.00, 0.34)</b>   |
| $\log(\pi_{PA})$ ON |              |             |                       |
| DT                  | 0.12         | 0.07        | (-0.02, 0.24)         |
| $\log(\pi_{NA})$ ON |              |             |                       |
| DT                  | <b>-0.39</b> | <b>0.06</b> | <b>(-0.50, 0.27)</b>  |
| $\log(\psi)$ ON     |              |             |                       |
| DT                  | <b>-0.18</b> | <b>0.07</b> | <b>(-0.31, -0.04)</b> |
| $\mu_{PA}$ ON       |              |             |                       |
| DT                  | <b>0.24</b>  | <b>0.07</b> | <b>(0.11, 0.37)</b>   |
| $\mu_{NA}$ ON       |              |             |                       |
| DT                  | <b>-0.41</b> | <b>0.06</b> | <b>(-0.52, -0.29)</b> |

*Note.* Standardized effects are reported. PSD = posterior standard deviation.  $\mu_{PA}$ =positive affect mean (random intercept),  $\mu_{NA}$ = negative affect mean (random intercept).  $\phi_{nn}$  = NA autoregression,  $\phi_{pp}$  PA autoregression,  $\phi_{pn}$ = cross-lagged effect NA->PA,  $\phi_{np}$ = cross-lagged effect PA->NA,  $\log(\pi_{PA})$  = log positive affect innovation variance,  $\log(\pi_{NA})$ = log negative affect innovation variance,  $\log(\psi)$ =log of negative innovation covariance. Bold face effects are significant based on 95% credibility interval (CI).

## B. Tables for the DSEM with only PTSS as a predictor.

Table 3b

Within-level standardized estimates

| Parameter        | $\beta$ | PSD   | 95% CI           |
|------------------|---------|-------|------------------|
| $\phi_{nn}$      | 0.37    | 0.004 | (0.358, 0.374)   |
| $\phi_{pp}$      | 0.48    | 0.004 | (0.475, 0.490)   |
| $\phi_{np}$      | -0.03   | 0.004 | (-0.035, -0.020) |
| $\phi_{pn}$      | 0.00    | 0.004 | (-0.008, 0.006)  |
| $\delta PA_{it}$ | 0.65    | 0.004 | (0.641, 0.656)   |
| $\delta NA_{it}$ | 0.52    | 0.006 | (0.509, 0.530)   |
| $\psi_{it}$ by   |         |       |                  |
| PA               | 0.24    | 0.004 | (0.237, 0.251)   |
| NA               | -0.48   | 0.005 | (-0.487, -0.468) |

*Note.*  $\phi_{nn}$  = NA autoregression,  $\phi_{pp}$  PA autoregression,  $\phi_{pn}$  = cross-lagged effect NA->PA,  $\phi_{np}$  = cross-lagged effect PA->NA,  $\delta PA_{it}$  positive affect innovation,  $\delta NA_{it}$  = negative affect innovation.  $\psi_{it}$  is the variance of the common factor  $\eta$  of the residuals, i.e., the residual covariance. The innovation parameters corresponding level 2 random variance terms are referred to as  $\pi PA$  and  $\pi NA$  (for the variances) and  $\psi$  for the covariance in subsequent tables of the between person effects. PSD = posterior standard deviation. CI = Bayes credibility interval.

Table 4b  
Residual variances and correlations of random effects

|                     | Variance<br>(CI)       | 1            | 2            | 3            | 4            | 5           | 6            | 7           | 8     | 9    |
|---------------------|------------------------|--------------|--------------|--------------|--------------|-------------|--------------|-------------|-------|------|
| 1. $\varphi_{nn}$   | 0.039<br>(0.032,0.048) | 1.00         |              |              |              |             |              |             |       |      |
| 2. $\varphi_{pp}$   | 0.027<br>(0.022,0.034) | <b>0.33</b>  | 1.00         |              |              |             |              |             |       |      |
| 3. $\varphi_{np}$   | 0.001<br>(0.001,0.002) | 0.03         | <b>-0.18</b> | 1.00         |              |             |              |             |       |      |
| 4. $\varphi_{pn}$   | 0.012<br>(0.009,0.017) | <b>-0.29</b> | -0.05        | <b>0.80</b>  | 1.00         |             |              |             |       |      |
| 5. $\log(\pi_{PA})$ | 0.892<br>(0.744,1.082) | <b>-0.25</b> | -0.05        | 0.01         | -0.03        | 1.00        |              |             |       |      |
| 6. $\log(\pi_{NA})$ | 1.737<br>(1.420,2.141) | <b>0.19</b>  | <b>-0.28</b> | 0.07         | -0.07        | <b>0.16</b> | 1.00         |             |       |      |
| 7. $\log(\psi)$     | 2.338<br>(1.925,2.869) | 0.07         | 0.05         | <b>-0.40</b> | <b>-0.28</b> | <b>0.42</b> | 0.13         | 1.00        |       |      |
| 8. $\mu_{PA}$       | 1.166<br>(0.975,1.406) | <b>-0.20</b> | 0.06         | -0.13        | -0.06        | <b>0.44</b> | <b>-0.19</b> | <b>0.38</b> | 1.00  |      |
| 9. $\mu_{NA}$       | 0.222<br>(0.184,0.271) | <b>0.34</b>  | <b>-0.15</b> | 0.17         | 0.06         | 0.01        | <b>0.53</b>  | 0.06        | -0.01 | 1.00 |

*Note.*  $\mu_{PA}$ =positive affect mean (random intercept),  $\mu_{NA}$ = negative affect mean (random intercept).  $\varphi_{nn}$  = NA autoregression,  $\varphi_{pp}$  PA autoregression,  $\varphi_{pn}$ = cross-lagged effect NA->PA,  $\varphi_{np}$ = cross-lagged effect PA->NA,  $\log(\pi_{PA})$  = log positive affect innovation variance,  $\log(\pi_{NA})$ = log negative affect innovation variance,  $\log(\psi)$ =log of negative innovation covariance. Bold face effects are significant based on 95% credibility interval (CI).

Table 5b

## Level 2 direct effects

| Variables           | $\beta$      | PSD         | 95% CI                |
|---------------------|--------------|-------------|-----------------------|
| $\phi_{nn}$ ON      |              |             |                       |
| PTSS                | <b>0.29</b>  | <b>0.06</b> | <b>(0.16, 0.41)</b>   |
| $\phi_{pp}$ ON      |              |             |                       |
| PTSS                | -0.12        | 0.07        | (-0.25, 0.02)         |
| $\phi_{np}$ ON      |              |             |                       |
| PTSS                | 0.00         | 0.09        | (-0.18, 0.18)         |
| $\phi_{pn}$ ON      |              |             |                       |
| PTSS                | -0.04        | 0.09        | (-0.22, 0.14)         |
| $\log(\pi_{PA})$ ON |              |             |                       |
| PTSS                | -0.06        | 0.07        | (-0.19, 0.07)         |
| $\log(\pi_{NA})$ ON |              |             |                       |
| PTSS                | <b>0.55</b>  | <b>0.05</b> | <b>(0.45, 0.64)</b>   |
| $\log(\psi)$ ON     |              |             |                       |
| PTSS                | <b>0.17</b>  | <b>0.07</b> | <b>(0.03, 0.30)</b>   |
| $\mu_{PA}$ ON       |              |             |                       |
| PTSS                | <b>-0.29</b> | <b>0.06</b> | <b>(-0.40, -0.16)</b> |
| $\mu_{NA}$ ON       |              |             |                       |
| PTSS                | <b>0.54</b>  | <b>0.05</b> | <b>(0.44, 0.63)</b>   |

*Note.* Standardized effects are reported. PSD = posterior standard deviation.  $\mu_{PA}$ =positive affect mean (random intercept),  $\mu_{NA}$ = negative affect mean (random intercept).  $\phi_{nn}$  = NA autoregression,  $\phi_{pp}$  PA autoregression,  $\phi_{pn}$ = cross-lagged effect NA->PA,  $\phi_{np}$ = cross-lagged effect PA->NA,  $\log(\pi_{PA})$  = log positive affect innovation variance,  $\log(\pi_{NA})$ = log negative affect innovation variance,  $\log(\psi)$ =log of negative innovation covariance. Bold face effects are significant based on 95% credibility interval (CI).

C. Tables for the DSEM with distress tolerance, PTSS, and gender as unstructured predictors.

Table 3c

Within-level standardized estimates

| Parameter        | $\beta$ | PSD   | 95% CI           |
|------------------|---------|-------|------------------|
| $\phi_{nn}$      | 0.37    | 0.004 | (0.358, 0.374)   |
| $\phi_{pp}$      | 0.48    | 0.004 | (0.475, 0.491)   |
| $\phi_{np}$      | -0.03   | 0.004 | (-0.035, -0.020) |
| $\phi_{pn}$      | 0.00    | 0.004 | (-0.007, 0.007)  |
| $\delta PA_{it}$ | 0.65    | 0.003 | (0.641, 0.655)   |
| $\delta NA_{it}$ | 0.52    | 0.006 | (0.510, 0.533)   |
| $\psi_{it}$ by   |         |       |                  |
| PA               | 0.25    | 0.003 | (0.239, 0.251)   |
| NA               | -0.48   | 0.005 | (-0.487, -0.466) |

*Note.*  $\phi_{nn}$  = NA autoregression,  $\phi_{pp}$  PA autoregression,  $\phi_{pn}$  = cross-lagged effect NA->PA,  $\phi_{np}$  = cross-lagged effect PA->NA,  $\delta PA_{it}$  positive affect innovation,  $\delta NA_{it}$  = negative affect innovation.  $\psi_{it}$  is the variance of the common factor  $\eta$  of the residuals, i.e., the residual covariance. The innovation parameters corresponding level 2 random variance terms are referred to as  $\pi PA$  and  $\pi NA$  (for the variances) and  $\psi$  for the covariance in subsequent tables of the between person effects. PSD = posterior standard deviation. CI = Bayes credibility interval.

Table 4c  
Residual variances and correlations of random effects

|                     | Variance<br>(CI)       | 1            | 2            | 3            | 4            | 5           | 6            | 7           | 8     | 9    |
|---------------------|------------------------|--------------|--------------|--------------|--------------|-------------|--------------|-------------|-------|------|
| 1. $\varphi_{nn}$   | 0.037<br>(0.030,0.046) | 1.00         |              |              |              |             |              |             |       |      |
| 2. $\varphi_{pp}$   | 0.027<br>(0.022,0.033) | <b>0.33</b>  | 1.00         |              |              |             |              |             |       |      |
| 3. $\varphi_{np}$   | 0.002<br>(0.001,0.002) | 0.04         | <b>-0.18</b> | 1.00         |              |             |              |             |       |      |
| 4. $\varphi_{pn}$   | 0.012<br>(0.008,0.016) | <b>-0.27</b> | -0.06        | <b>0.81</b>  | 1.00         |             |              |             |       |      |
| 5. $\log(\pi_{PA})$ | 0.890<br>(0.741,1.078) | <b>-0.23</b> | -0.05        | 0.00         | -0.04        | 1.00        |              |             |       |      |
| 6. $\log(\pi_{NA})$ | 1.746<br>(1.427,2.150) | <b>0.18</b>  | <b>-0.29</b> | 0.08         | -0.06        | <b>0.16</b> | 1.00         |             |       |      |
| 7. $\log(\psi)$     | 2.336<br>(1.919,2.869) | 0.04         | 0.06         | <b>-0.41</b> | <b>-0.27</b> | <b>0.44</b> | 0.13         | 1.00        |       |      |
| 8. $\mu_{PA}$       | 1.162<br>(0.970,1.406) | <b>-0.18</b> | 0.07         | -0.14        | -0.07        | <b>0.43</b> | <b>-0.19</b> | <b>0.39</b> | 1.00  |      |
| 9. $\mu_{NA}$       | 0.223<br>(0.184,0.272) | <b>0.34</b>  | <b>-0.15</b> | 0.18         | 0.06         | 0.02        | <b>0.53</b>  | 0.06        | -0.01 | 1.00 |

*Note.*  $\mu_{PA}$ =positive affect mean (random intercept),  $\mu_{NA}$ = negative affect mean (random intercept).  $\varphi_{nn}$  = NA autoregression,  $\varphi_{pp}$  PA autoregression,  $\varphi_{pn}$ = cross-lagged effect NA->PA,  $\varphi_{np}$ = cross-lagged effect PA->NA,  $\log(\pi_{PA})$  = log positive affect innovation variance,  $\log(\pi_{NA})$ = log negative affect innovation variance,  $\log(\psi)$ =log of negative innovation covariance. Bold face effects are significant based on 95% credibility interval (CI).



Table 5c

## Level 2 direct effects

| Variables           | $\beta$      | PSD         | 95% CI                |
|---------------------|--------------|-------------|-----------------------|
| $\phi_{nn}$ ON      |              |             |                       |
| PTSS                | 0.13         | 0.09        | (-0.06, 0.31)         |
| DT                  | <b>-0.23</b> | <b>0.09</b> | <b>(-0.41, -0.04)</b> |
| gender              | -0.11        | 0.06        | (-0.23, 0.02)         |
| $\phi_{pp}$ ON      |              |             |                       |
| PTSS                | -0.08        | 0.10        | (-0.26, 0.13)         |
| DT                  | 0.07         | 0.10        | (-0.12, 0.27)         |
| Gender              | <b>-0.16</b> | <b>0.07</b> | <b>(-0.29, -0.03)</b> |
| $\phi_{np}$ ON      |              |             |                       |
| PTSS                | 0.01         | 0.12        | (-0.23, 0.25)         |
| DT                  | 0.00         | 0.12        | (-0.24, 0.25)         |
| Gender              | 0.04         | 0.08        | (-0.12, 0.20)         |
| $\phi_{pn}$ ON      |              |             |                       |
| PTSS                | 0.16         | 0.13        | (-0.10, 0.41)         |
| DT                  | <b>0.27</b>  | <b>0.12</b> | <b>(0.03, 0.50)</b>   |
| Gender              | 0.01         | 0.08        | (-0.15, 0.18)         |
| $\log(\pi_{PA})$ ON |              |             |                       |
| PTSS                | 0.02         | 0.09        | (-0.17, 0.20)         |
| DT                  | 0.12         | 0.10        | (-0.07, 0.30)         |
| Gender              | 0.04         | 0.07        | (-0.09, 0.16)         |
| $\log(\pi_{NA})$ ON |              |             |                       |
| PTSS                | <b>0.54</b>  | <b>0.08</b> | <b>(0.38, 0.68)</b>   |
| DT                  | -0.02        | 0.09        | (-0.18, 0.15)         |
| Gender              | -0.04        | 0.06        | (-0.15, 0.07)         |
| $\log(\psi)$ ON     |              |             |                       |
| PTSS                | 0.09         | 0.10        | (-0.11, 0.28)         |
| DT                  | -0.12        | 0.10        | (-0.31, 0.08)         |
| Gender              | -0.01        | 0.07        | (-0.14, 0.12)         |
| $\mu_{PA}$ ON       |              |             |                       |
| PTSS                | <b>-0.24</b> | <b>0.09</b> | <b>(-0.41, -0.06)</b> |
| DT                  | 0.07         | 0.09        | (-0.11, 0.26)         |
| Gender              | 0.08         | 0.06        | (-0.05, 0.20)         |
| $\mu_{NA}$ ON       |              |             |                       |
| PTSS                | <b>0.48</b>  | <b>0.08</b> | <b>(0.33, 0.63)</b>   |
| DT                  | -0.08        | 0.08        | (-0.25, 0.08)         |
| Gender              | 0.01         | 0.06        | (-0.10, 0.12)         |

*Note.* Standardized effects are reported. PSD = posterior standard deviation.  $\mu_{PA}$ =positive affect mean (random intercept),  $\mu_{NA}$ = negative affect mean (random intercept).  $\phi_{nn}$  = NA autoregression,  $\phi_{pp}$  PA autoregression,  $\phi_{pn}$ = cross-lagged effect NA->PA,  $\phi_{np}$ = cross-lagged effect PA->NA,  $\log(\pi_{PA})$  = log positive affect innovation variance,  $\log(\pi_{NA})$ = log negative affect innovation variance,  $\log(\psi)$ =log of negative innovation covariance. Bold face effects are significant based on 95% credibility interval (CI).
